1 The reduced prevalence of macrolide resistance in *Mycoplasma pneumoniae* clinical  
2 isolates from pediatric patients in Beijing in 2016

3 Xiujun Tian, Ran Wei, Junyan Shao, Hong Wang, Jing Li, Wei Zhou, Xuanguang Qin,  
4 Yinghui Hu, Haiwei Dou, Dongxing Guo, Jingyi Li, Dan Li, Baoping Xu, Deli Xin

5 Xiujun Tian and Ran Wei contributed equally to this work.

6 Deli Xin and Baoping Xu are co-corresponding authors.

7 Beijing Key Laboratory for Research on Prevention and Treatment of Tropical Diseases, Beijing Tropical  
8 Medicine Research Institute, Beijing Friendship Hospital, Capital Medical University, China Meitan General  
9 Hospital, Civil Activation General Hospital, Beijing Changping Hospital of Integrated Chinese and Western  
10 Medicine, Peking University Third Hospital, Beijing Chao-Yang hospital and New Century International  
11 Children's Hospital, Beijing, 100050 China

12 **Older children especially from seven to thirteen years old are more prone to develop**  
13 ***Mycoplasma pneumoniae* (MP) infection; in winter children are more susceptible to infect**  
14 **with MP. In Beijing, China in 2016 the rates of macrolide resistance of MP were 69.48% (in**  
15 **total children), 61.59% (in outpatients) and 79.28% (in hospitalized patients), respectively.**  
16 **All the macrolide resistant isolates harbored A2063G or A2064G mutation in the 23S rRNA**  
17 **gene. Seven isolates showed a mixed infection. Susceptibility results showed that 73 isolates**  
18 **with the A2063G mutation demonstrated different levels resistance to erythromycin (MIC=8**  
19 **to>256µg/ml), azithromycin (MIC=8 to>64µg/ml) and josamycin (MIC=2 to 8µg/ml). No**  
20 **cross-resistance was observed in the in the antibiotics of levofloxacin and tetracycline against**  
21 **MP.**

22

23 *Mycoplasma pneumoniae* (MP) is an important leading cause of community-acquired pneumonia  
24 (CAP) in children, accounting for 10%–40% of CAP cases<sup>1</sup>. Macrolide-resistant MP (MRMP) was  
25 first isolated in Asia and has rapidly increased over the past decades<sup>2</sup>. Our previous study found  
26 that 46 clinical isolates collected from 2003 to 2006 were MRMP, the rate of macrolide resistance  
27 was as high as 92% in Beijing<sup>3</sup>. Macrolide resistance rates were 3.5 -13.2% in USA<sup>4-5</sup>, below 10%  
28 in Europe<sup>6</sup>, 50-90% in Japan<sup>7-8</sup> and more than 90% in China<sup>3,9-10</sup>.

29 Tanaka et al found that the prevalence of macrolide-resistant MP gradually declined during  
30 2013–2015<sup>11</sup>. In China few studies about macrolide-resistant were reported since 2015, this study

31 was scheduled to investigate the epidemiology and macrolide resistance rate of pediatric patients  
32 with MP infection in Beijing in 2016.

### 33 **MATERIALS AND METHODS**

34 ***M. pneumoniae* strains.** A total of 619 pediatric patients suspected as MP infection at seven  
35 hospitals in Beijing (China Meitan General Hospital, Civil Activation General Hospital, Beijing  
36 Changping Hospital of Integrated Chinese and Western Medicine, Peking University Third  
37 Hospital, Beijing Chao-Yang Hospital, New Century International Children's Hospital, and  
38 Beijing Friendship Hospital) were enrolled in the study. During January 2016 to December 2016,  
39 patients aged from 1 month to 14 years, had a preceding fever, cough or pharyngalgia whose  
40 onset time was from 1 to 7 days were eligible for enrollment. Throat swabs or BALF were  
41 obtained in 24h after their enrollment.

42 Positive result for culture or DNA detection by real-time PCR from throat swabs or BALF was  
43 considered as MP infection. For MP culture, clinical specimens were vortexed, supplemented with  
44 amphotericin B and penicillin, and inoculated into SP-4 medium. The medium was incubated at  
45 37°C, and observed daily for 2–6 weeks for a decrease in pH (a red to yellow color change). Then  
46 the positive specimens for MP culture were identified using a real-time PCR<sup>12</sup>. DNA of MP in  
47 throat swabs or BALF was extracted using a QIAmp DNA Mini Kit (Qiagen, Hilden,  
48 Germany). Then, the above real-time PCR was done to detect DNA of MP.

49 **Detection of the mutations associated with macrolide resistance of MP.** Macrolide resistance  
50 associated mutations in domain V of the 23S rRNA gene were detected using a direct sequencing  
51 method as previously reported<sup>13</sup>. The amplification product of each MP strain, including the  
52 reference strain M129 (ATCC 29342) was sequenced by the Invitrogen Biotechnology Co., Ltd.

53 **Antimicrobial susceptibility testing.** The minimum inhibitory concentrations (MICs) of five  
54 macrolides (erythromycin, azithromycin, levofloxacin, tetracycline and josamycin) for MP strains  
55 were determined by broth microdilution methods with SP4 broth (Remel). MP reference strain  
56 M129 was tested as an antibiotic-sensitive control. Susceptibility tests were performed in  
57 triplicate.

58 **Statistical analysis.** All data was expressed as means and standard deviations, unless otherwise  
59 indicated. Differences in categorical variables were assessed with the  $\chi^2$  test or Fisher's exact test.

60 All analyses were performed using SPSS for Windows, version 17.0 software (SPSS Inc., Chicago,

61 IL, USA), and a two-sided P value <0.05 were considered statistically significant.

## 62 **RESULTS**

63 **Epidemiology of pediatric patients with MP infection.** A total of 262 (42.33%) pediatric  
64 patients were diagnosed as MP infection by culture or DNA detection of MP. Among the 238  
65 patients with MP infection marked with age, the age ranged from 1.5 months to 14 years with a  
66 median of 5.67 years, Fifty-seven (23.95%) cases were 0-3 years, 71 (29.83%) were 4-6 years and  
67 110 (46.22%) were 7 -13 years. The detection rates of MP infection in the above different age  
68 groups were 52.38%, 34.13% and 34.13%, respectively. The incidence of MP infection increased  
69 with age. The prevalence of MP infection in patients aged 7-13 especially 7-9 years was  
70 significantly higher than those in the other two groups ( $P < .001$ ). Among the 246 patients with MP  
71 infection marked with sex, male cases are 123, female cases are 123, the ratio of male to female  
72 was 1:1. MP infection predominated in fall and winter, 77 cases (29.84%) in fall (from September  
73 through November) and 89 (34.50%) cases in winter (from December through February) were  
74 involved, respectively, compared with 34 cases (13.18%) in spring (from March through May),  
75 and 58 (22.48%) cases in summer (from June through August). The prevalence of MP infection  
76 was much higher during winter than that in spring in pediatric patients ( $P < .05$ ). The age and  
77 season distributions of MP infection in pediatric patients were shown in Fig. 1 and Fig. 2.

78 **Macrolide resistance rates of pediatric patients with MP infection.** A total of 249 MP clinical  
79 isolates whose gene sequence in domain V of the 23S rRNA gene were successfully determined,  
80 173 were MRMP strains. The rate of macrolide resistance was 69.48% (173/249) in pediatric  
81 patients with MP infection in Beijing in 2016. There were 138 outpatients and 111 hospitalized  
82 patients in the 249 pediatric patients. The rates of macrolide resistance in outpatients and  
83 inpatients were 61.59% (85/138) and 78.38% (88/111), respectively. The summary of the rates  
84 of macrolide resistance was shown in Table 1. The rates of macrolide resistance in different age  
85 groups are follows: 0-3 years, 70.18% (40/57); 4-6 years, 53.52% (38/71); 7-13 years, 70.91%  
86 (78/110). The rates of macrolide resistance in different seasons are follows: spring, 67.74%  
87 (21/31); summer, 72.88% (43/59); fall, 67.12% (49/73) and winter, 69.41% (59/85).

88 **Antimicrobial susceptibility testing.** A total of 78 clinical isolates were randomly selected (7  
89 isolates without domain V region mutations and 71 isolates with A2063G mutation) in the  
90 antimicrobial susceptibility testing. Compared with the results of 7 clinical isolates carrying a wild

91 type of 23S rRNA gene and the MP reference strain M129, all the 71 clinical isolates with  
92 A2063G mutation except BS315 strain showed a high resistance to erythromycin (64  
93 to >256µg/ml). The erythromycin-resistant strains showed cross-resistance to azithromycin and  
94 josamycin. The MIC of azithromycin (10 isolates with MIC<sub>90</sub> value of 32µg/ml) was lower than  
95 that of erythromycin. The MIC of josamycin was the lowest (2 to 8µg/ml) in the three macrolides.  
96 The MIC<sub>90</sub> values of BS315 strain to erythromycin, azithromycin and josamycin were 8µg/ml,  
97 16µg/ml and 4µg/ml, respectively.  
98 All the selected MP clinical isolates as well as the MP reference strain M129 were susceptible to  
99 levofloxacin and tetracycline. Levofloxacin and tetracycline showed similar MIC<sub>90</sub> distribution for  
100 MP, the range of MIC<sub>90</sub> values of levofloxacin and tetracycline were between 0.125 and 1µg/ml  
101 (Table 2).

## 102 **DISCUSSION**

103 To our knowledge, this is the first study about the evaluation of macrolide –resistance rate in  
104 pediatric outpatients with MP infection in Beijing, China. The fact of high prevalence of MRMP  
105 clinical isolates in pediatric patients in China mostly come from the data of hospitalized patients.  
106 Outpatients are not easily achievable as many MP infections such as mild tracheobronchitis are  
107 often undiagnosed, the macrolide resistance rate of MP in outpatients especially in pediatric  
108 outpatients is still unclear. To investigate this and monitor the situation of macrolide resistance in  
109 pediatric patients with MP infection, the present study was designed.  
110 The infection rate of MP was 42.33% (262/619) in pediatric patients with respiratory infections in  
111 the present study. The infection of MP is related to age and season. The infection of MP was  
112 mainly prevalent in 7-13 especially 7-9 years old pediatric patients in the present study, which was  
113 in accordance with the previous conclusion that the main burden of the infection is typically in  
114 preschool and school-age children<sup>14-15</sup>. Moreover, the prevalence of MP infection in patients aged  
115 7-13 was significantly higher than those in the other two groups (P< .001) in our study. The peak  
116 season of MP infection was winter in our study, and there was seasonal difference for the  
117 prevalence of MP infection, it was higher during winter than that in spring (P< .05). These  
118 findings were consistent with the reports that the epidemic seasons in north of China is winter but  
119 is summer and autumn in the south of China<sup>8,16</sup>.  
120 Macrolides usually are used as the first-line therapeutic drug for MP infection in children. Since

121 the isolation of the first MRMP strain, macrolide resistance rate has been increasing worldwide.  
122 However, since 2015 the reports about macrolide resistance rate of MP are rare in the world, no  
123 report in China. So our present analysis is significant because it reported on the recent macrolide  
124 resistance rate of MP in Chinese children. The macrolide resistance rate was 69.48% in pediatric  
125 patients with MP infection in Beijing, China in 2016. The macrolide resistance rates recently  
126 published were 100% in children of Zhejiang province, China in 2014<sup>10</sup>, 87.2% in South Korean  
127 children in 2015<sup>17</sup>, 43.6% in Japanese children in 2015<sup>11</sup>, 47.1% in children of Hong-Kong in  
128 2014<sup>18</sup>, 13.2% in American children through 2012 to 2014<sup>5</sup>, 9.3% in English children between  
129 2014 and 2015<sup>19</sup>. Compared with the above data, the prevalence of MRMP clinical isolates among  
130 children in China has significantly decreased to 69.48% from 80-100%<sup>3,10,13</sup>. The decrease of high  
131 rate of macrolide resistance might be partially attributable to the inclusion of pediatric outpatients.  
132 The macrolide resistance rate in pediatric outpatients with MP infection was only 61.59%. This is  
133 the first report about the evaluation of macrolide resistance rate in pediatric outpatients with MP  
134 infection in Beijing, China. Cao et al ever investigated the rate of macrolide resistance in  
135 outpatients, but the patients in his study were adults and adolescents (aged  $\geq 14$  years)<sup>20</sup>. Ishiguro  
136 et al showed that the rate of macrolide resistance in pediatric outpatients in Hokkaido, Japan was  
137 44.3%. However, the sample size in his study was small, there were only 31 pediatric outpatients  
138 enrolled from December 1, 2012 to July 31, 2014<sup>8</sup>. This is also the first report about the lowest rate  
139 of macrolide resistance in MP clinical isolates in pediatric patients in Beijing since 2009. The rate  
140 of macrolide resistance in pediatric hospitalized patients was 79.28%, which was also lower than  
141 those in most reports in Asian countries. This might be due to the gradually reduced prevalence of  
142 macrolide resistant MP infection. Tanaka et al found that the prevalence of MRMP was high in  
143 Japan during 2008–2012, gradually declined during 2013–2015. They thought the rate of  
144 macrolide resistance might be affected by changes in the use of oral macrolide agents<sup>11</sup>. Possibly,  
145 the situation in our country was similar to Japan. Thankfully, the situation of macrolide resistance  
146 of MP was not as serious as previously reported in China.

147 Although MRMP clinical isolates are prevalent worldwide, to our knowledge, the resistance  
148 mechanisms are still uncertain, the point mutation in the specific locus of the 23S rRNA gene  
149 region, especially in loci 2063 and 2064 is most commonly proposed<sup>21-23</sup>. In the present study,  
150 A2063G transition predominated in pediatric patients with MP infection, which involved 161

151 cases (up to 93.06%). Meanwhile, eleven A2064G transition cases were identified. A point  
152 mutation in the loci 2063 and 2064 plays an important role in the macrolide resistance in our study,  
153 no other macrolide-resistant related point mutations were identified. In addition, seven mixed  
154 infection cases were identified. Cardinale et al reported the first case showing the detection of  
155 macrolide-resistance in MP not at admission but after 10 days of clarithromycin treatment<sup>24</sup>,  
156 Suzuki et al confirmed his finding in 21 children infected with MP. All the MP clinical strains  
157 shifted from macrolide sensitive at beginning to macrolide resistant after 7-24 days treatment of  
158 clarithromycin or azithromycin<sup>25</sup>. The above mentioned findings support a hypothesis that the  
159 emergence of mixed type of macrolide-resistant strains is possible selected outgrowth during drug  
160 administration.

161 Based on the results of the susceptibility test, the A2063G transitions are responsible for  
162 high-level resistance to 14- and 15-member ring macrolides, such as erythromycin(8 to>256  $\mu$   
163 g/ml) and azithromycin (8 to>64  $\mu$  g/ml) in *M. pneumoniae*. However, 16-member ring  
164 macrolides, such as josamycin demonstrated middle-level resistance, with MICs of 2 to 8  $\mu$  g/ml  
165 against clinical strains with the A2063G mutation. Cross-resistance was not observed in the  
166 levofloxacin and tetracycline groups. All the isolates including the strains with  
167 macrolide-resistance associated mutations remained susceptible to levofloxacin and tetracycline.  
168 To date, no levofloxacin or tetracycline resistant strains have been isolated from MP clinical  
169 specimens. This situation of high macrolide resistance for first-line treatment drugs had caused  
170 great difficulties in the clinical treatment of MP pneumonia, especially in pediatric infections. The  
171 data of our susceptibility tests demonstrated that all the MP isolates were sensitive to levofloxacin  
172 and tetracycline. This finding suggests that in the situation of patients with the refractory MP  
173 pneumonia, such antibiotics can act as alternative medicines for treating MP infection in adults,  
174 however, tetracycline and levofloxacin are not approved for use in children under 8 years old and  
175 under 18 years old, respectively, in China.

176 In summary, older children especially 7-13 years old are more prone to developing MP infection;  
177 children are more susceptible to infect with MP in winter. The infection rate of MP was 42.33% in  
178 pediatric patients in Beijing in 2016. The rates of macrolide resistance of MP were 69.48% (in  
179 total children), 61.59% (in outpatients) and 79.28% (in hospitalized patients), respectively in  
180 Beijing, China in 2016, this is the first study about the evaluation of macrolide –resistance rate in

181 pediatric outpatients with MP infection in Beijing, China. A point mutation in the loci 2063 A-G  
182 predominated in 93.06% of MRMP clinical isolates in Beijing population in 2016.

183 Cross-resistance was not observed in the antibiotics of levofloxacin and tetracycline against  
184 *Mycoplasma pneumoniae*.

## 185 ACKNOWLEDGMENTS

186 This study was supported by National Natural Science Foundation of China (grant reference  
187 number: 81271890) and Beijing Municipal Science and Technology Commission (grant reference  
188 number: Z171100001017081). We declare that the experiments performed and described here  
189 comply with the current laws of the People's Republic of China.

## 190 REFERENCES

- 191 1. **Waites K.** 2003. New concepts of *Mycoplasma pneumoniae* infections in children. *Pediatr. Pulmonol.*  
192 36:267–278.
- 193 2. **Okazaki N, Narita M, Yamada S, Izumikawa K, Umetsu M, Kenri T, Sasaki Y, Arakawa Y, Sasaki T.**  
194 2001. Characteristics of macrolide-resistant *Mycoplasma pneumoniae* strains isolated from patients and  
195 induced with erythromycin in vitro. *Microbiol. Immunol.* 45: 617–620.
- 196 3. **Xin D, Mi Z, Han X, Qin L, Li J, Wei T, Chen X, Ma S, Hou A, Li G, Shi D.** 2009. Molecular  
197 mechanisms of macrolide resistance in clinical isolates of *Mycoplasma pneumoniae* from China. *Antimicrob.*  
198 *Agents Chemother.* 53: 2158–2159.
- 199 4. **Diaz MH, Benitez AJ, Cross KE, Hicks LA, Kuttu P, Bramley AM, Chappell JD, Hymas W, Patel A, Qi**  
200 **C, Williams DJ, Arnold SR, Ampofo K, Self WH, Grijalva CG, Anderson EJ, McCullers JA, Pavia**  
201 **AT, Wunderink RG, Edwards KM, Jain S, Winchell JM.** 2015. Molecular Detection and characterization  
202 of *Mycoplasma pneumoniae* Among patients Hospitalized with Community-Acquired Pneumonia in  
203 the United States. *Open Forum Infect Dis.* 2:ofv106. doi: 10.1093/ofid/ofv106.
- 204 5. **Zheng X, Lee S, Selvarangan R, Qin X, Tang YW, Stiles J, Hong T, Todd K, Ratliff AE, Crabb**  
205 **DM, Xiao L, Atkinson TP, Waites KB.** 2015. Macrolide-Resistant *Mycoplasma pneumoniae*, United States.  
206 *Emerg Infect Dis.* 21:1470-1472.
- 207 6. **Pereyre S, Goret J, Bébéar C.** 2016.  
208 *Mycoplasma pneumoniae*: Current Knowledge on Macrolide Resistance and Treatment. *Front Microbiol.* 7:  
209 974.
- 210 7. **Yamazaki T, Kenri T.** 2016. Epidemiology of *Mycoplasma pneumoniae* infections in Japan and therapeutic  
211 strategies for macrolide resistant *M. pneumoniae*. *Front Microbiol.* 7:693.
- 212 8. **Ishiguro N, Koseki N, Kaiho M, Kikuta H, Togashi T, Oba K, Morita K, Nagano N, Nakanishi**  
213 **M, Hazama K, Watanabe T, Sasaki S, Horino A, Kenri T, Ariga T.** 2016. Regional Differences in  
214 Prevalence of Macrolide Resistance among Pediatric *Mycoplasma pneumoniae* Infections in Hokkaido, Japan.  
215 *Jpn. J. Infect. Dis.* 69:186-190.
- 216 9. **Yan C, Sun H, Xue G, Zhao H, Wang L, Feng Y, Li S.** 2014. A single-tube multiple-locus variable-number  
217 tandem-repeat analysis of *Mycoplasma pneumoniae* clinical specimens by use of multiplex PCR- capillary



- 218 electrophoresis. *J. Clin. Microbiol.* 52:4168–4171.
- 219 10. **Zhou Z, Li X, Chen X, Luo F, Pan C, Zheng X, Tan F.** 2015. Macrolide-resistant *Mycoplasma*  
220 *pneumoniae* in adults in Zhejiang, China. *Antimicrob. Agents Chemother.* 59:1048–1051.
- 221 11. **Tanaka T, Oishi T, Miyata I, Wakabayashi S, Kono M, Ono S, Kato A, Fukuda Y, Saito A, Kondo**  
222 **E, Teranishi H, Tanaka Y, Wakabayashi T, Akaike H, Ogita S, Ohno N, Nakano T, Terada K, Ouchi K.**  
223 2017. Macrolide-Resistant *Mycoplasma pneumoniae* Infection, Japan, 2008–2015. *Emerg Infect Dis.* 23:  
224 1703–1706.
- 225 12. **Guo DX, Hu WJ, Li D, Li JY, Li SG, Wu ZY, Tian XJ, Xin DL.** 2016. Development of real-time  
226 fluorescence quantitative PCR for the detection of *Mycoplasma pneumoniae*. *Infect Dis Info.* 29:52-56.
- 227 13. **Tian XJ, Dong YQ, Dong XP, Li JY, Li D, Jiang Y, Xin DL.** 2013. P1 gene of *Mycoplasma pneumoniae* in  
228 clinical isolates collected in Beijing in 2010 and relationship between genotyping and macrolide resistance.  
229 *Chin Med J (Engl)*.126:3944-3948.
- 230 14. **Shu LH, Xu JJ, Wang S, Zhong HQ, Dong XY, Jiang K, Zhang HY, Xiong Q, Wang C, Sun T, Sun**  
231 **C, Lu Q.** 2015. Distribution of pathogenic microorganisms and its relationship with clinical features in  
232 children with community acquired pneumonia. *Chin J Contemp Pediatr.*17:1056–1061.
- 233 15. **Yin Y, Lu Q, Yan X.** 2016. Epidemiology of *Mycoplasma pneumoniae* infections. *Zhonghua Er Ke Za*  
234 *Zhi.*54:91–93.
- 235 16. **Chen K, Jia R, Li L, Yang C, Shi Y.** 2015. The aetiology of community associated pneumonia in children in  
236 Nanjing, China and aetiological patterns associated with age and season. *BMC Public Health.* 15:113-118.
- 237 17. **Lee E, Cho HJ, Hong SJ, Lee J, Sung H, Yu J.** 2017. Prevalence and clinical manifestations of macrolide  
238 resistant *Mycoplasma pneumoniae* pneumonia in Korean children. *Korean J Pediatr.* 60:151-157.
- 239 18. **Ho PL, Law PY, Chan BW, Wong CW, To KK, Chiu SS, Cheng VC, Yam WC.** 2015. Emergence of  
240 macrolide-resistant *Mycoplasma pneumoniae* in Hong Kong is linked to increasing macrolide resistance in  
241 multilocus variable-number tandem-repeat analysis type 4-5-7-2. *J.Clin.Microbiol.* 53:3560–3564.
- 242 19. **Brown RJ, Macfarlane-Smith L, Phillips S, Chalker VJ.** 2015. Detection of macrolide resistant  
243 *Mycoplasma pneumoniae* in England, September 2014 to September 2015. *Euro. Surveill.* 20:30078. doi:  
244 10.2807/1560-7917.
- 245 20. **Cao B, Zhao CJ, Yin YD, Zhao F, Song SF, Bai L, Zhang JZ, Liu YM, Zhang YY, Wang H, Wang C.**  
246 2010. High prevalence of macrolide resistance in *Mycoplasma pneumoniae* isolates from adult and adolescent  
247 patients with respiratory tract infection in China. *Clin. Infect. Dis.* 51:189-194.
- 248 21. **Douthwaite S, Hansen LH, Mauvais P.** 2000. Macrolide-ketolide inhibition of MLS-resistant ribosomes is  
249 improved by alternative drug interaction with domain II of 23S rRNA. *Mol. Microbiol.* 36:183–193.
- 250 22. **Be'be'ar CM, Pereyre S.** 2005. Mechanisms of drug resistance in *Mycoplasma pneumoniae*. *Curr. Drug*  
251 *Targets. Infect Disord.* 5:263–271.
- 252 23. **Kawai Y, Miyashita N, Kubo M, Akaike H, Kato A, Nishizawa Y, Saito A, Kondo E, Teranishi H, Ogita**  
253 **S, Tanaka T, Kawasaki K, Nakano T, Terada K, Ouchi K.** 2013. Therapeutic efficacy of macrolides,  
254 minocycline, and tosufloxacin against macrolide resistant *Mycoplasma pneumoniae* pneumonia in pediatric  
255 patients. *Antimicrob. Agents Chemother.*57: 2252–2258.
- 256 24. **Cardinale F, Chironna M, Dumke R, Binetti A, Daleno C, Sallustio A, Valzano A, Esposito S.** 2011.  
257 Macrolide-resistant *Mycoplasma pneumoniae* in paediatric pneumonia. *Eur. Respir. J.*37:1522-1524.
- 258 25. **Suzuki Y, Shimotai Y, Itagaki T, Seto J, Ikeda T, Yahagi K, Mizuta K, Hongo S, Matsuzaki Y.** 2017.  
259 Development of macrolide resistance-associated mutations after macrolide treatment in children infected  
260 with *Mycoplasma pneumoniae*. *J. Med. Microbiol.* 11:1531-1538.



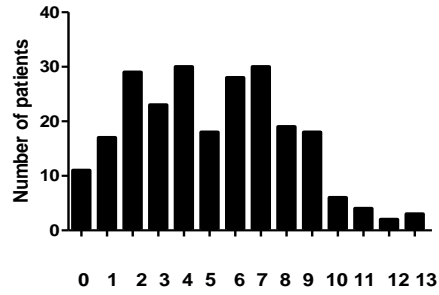

262

263 Fig. 1 The age distribution of MP infection in pediatric patients

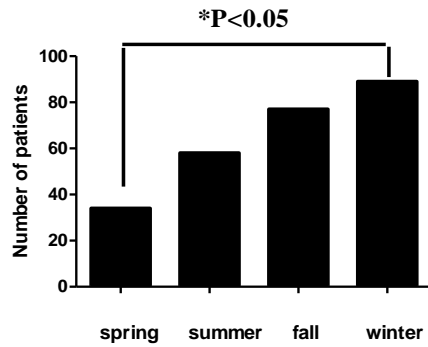

264

265 Fig.2 The season distribution of MP infection in pediatric patients

266

267 Table 1 The rate of macrolide resistance in pediatric patients with MP infection in 2016 in

268 Beijing

| unit                  | rate of macrolide resistance | Numbers of clinical isolates |                 |                 |
|-----------------------|------------------------------|------------------------------|-----------------|-----------------|
|                       |                              | sensitive strains            | A2063G mutation | A2064G mutation |
| Total patients        | 69.48%                       | 76                           | 155             | 11              |
| outpatients           | 61.59%                       | 53                           | 74              | 8               |
| hospitalized patients | 79.28%                       | 23                           | 81              | 3               |

269

270 Table 2 MIC<sub>90</sub> range of five antimicrobial agents against 78 *M. pneumoniae* clinical isolates and M129

| Isolates | No. of strains | erythromycin | azithromycin | josamycin | levofloxacin | tetracycline (µg/ml) |
|----------|----------------|--------------|--------------|-----------|--------------|----------------------|
|          |                |              |              |           |              |                      |

---

|                            |    |             |              |              |           |
|----------------------------|----|-------------|--------------|--------------|-----------|
| Clinical sensitive strains | 7  | 0.0018-0.03 | 0.0005-0.004 | 0.015-0.0625 | 0.125-0.5 |
|                            |    |             |              |              | 0.125-0.5 |
| M129 reference stain       | 1  | 0.032       | 0.008        | 0.063        | 0.5       |
|                            |    |             |              |              | 0.125     |
| A2063G mutation strains    | 71 | 8->256      | 8->64        | 2-8          | 0.25-1    |
|                            |    |             |              |              | 0.125-1   |

---

271

272

273

274

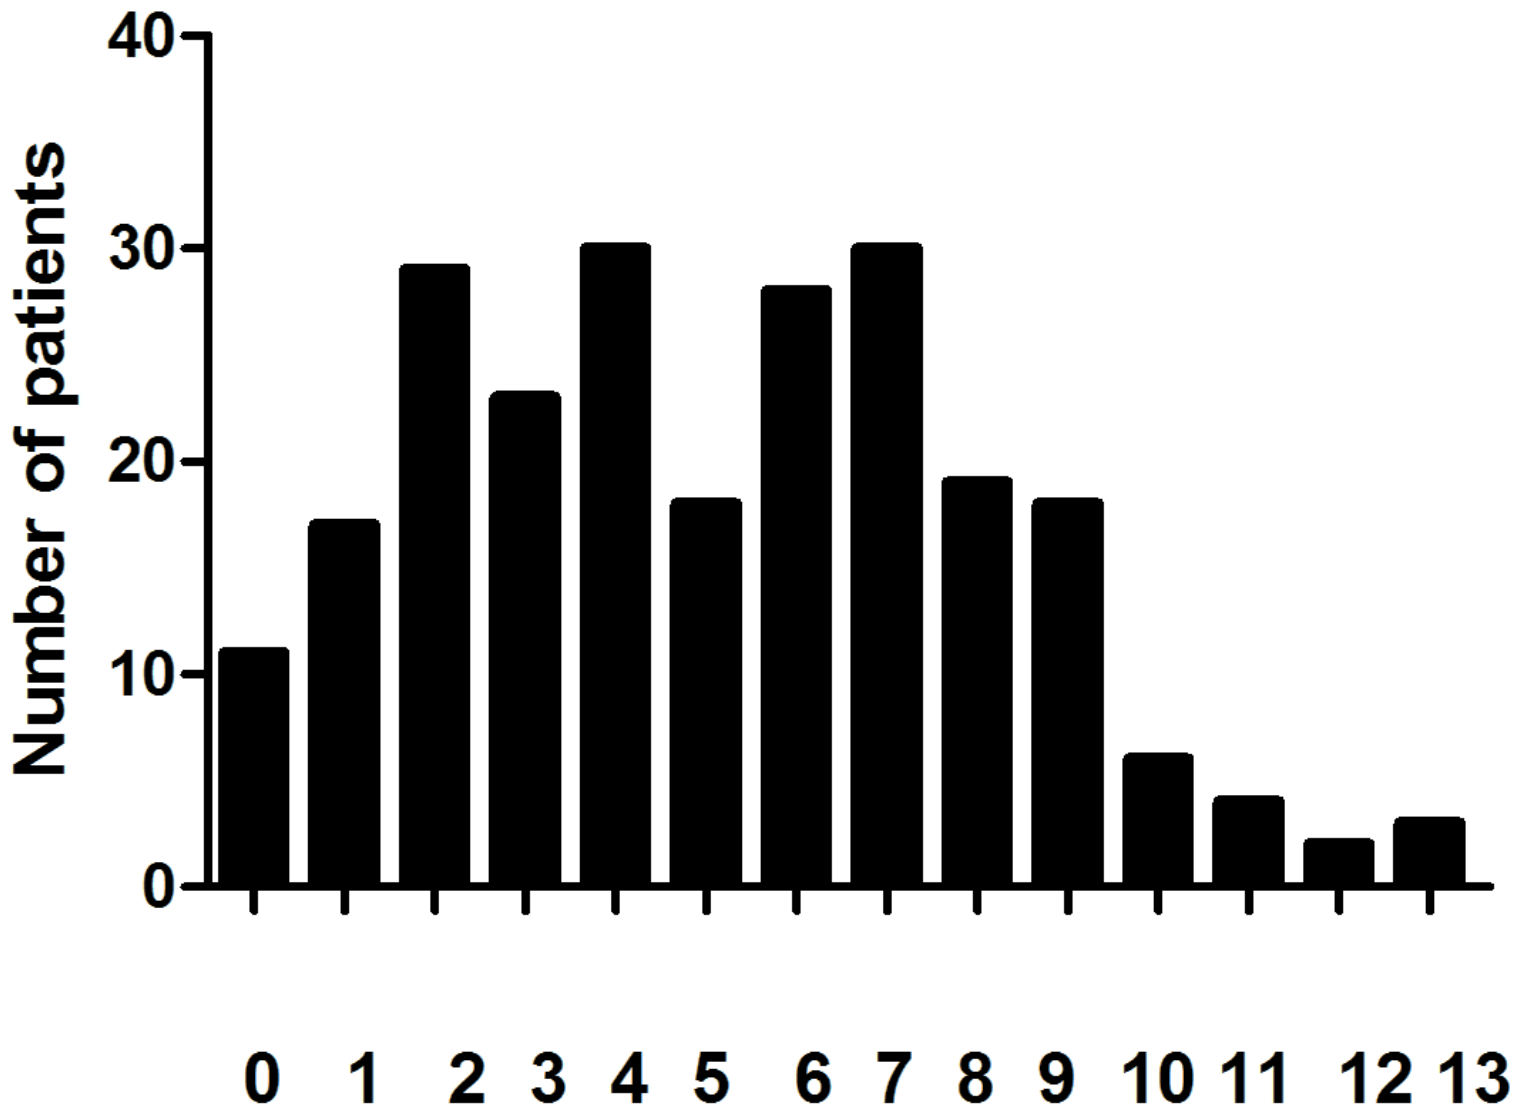

**\*P<0.05**

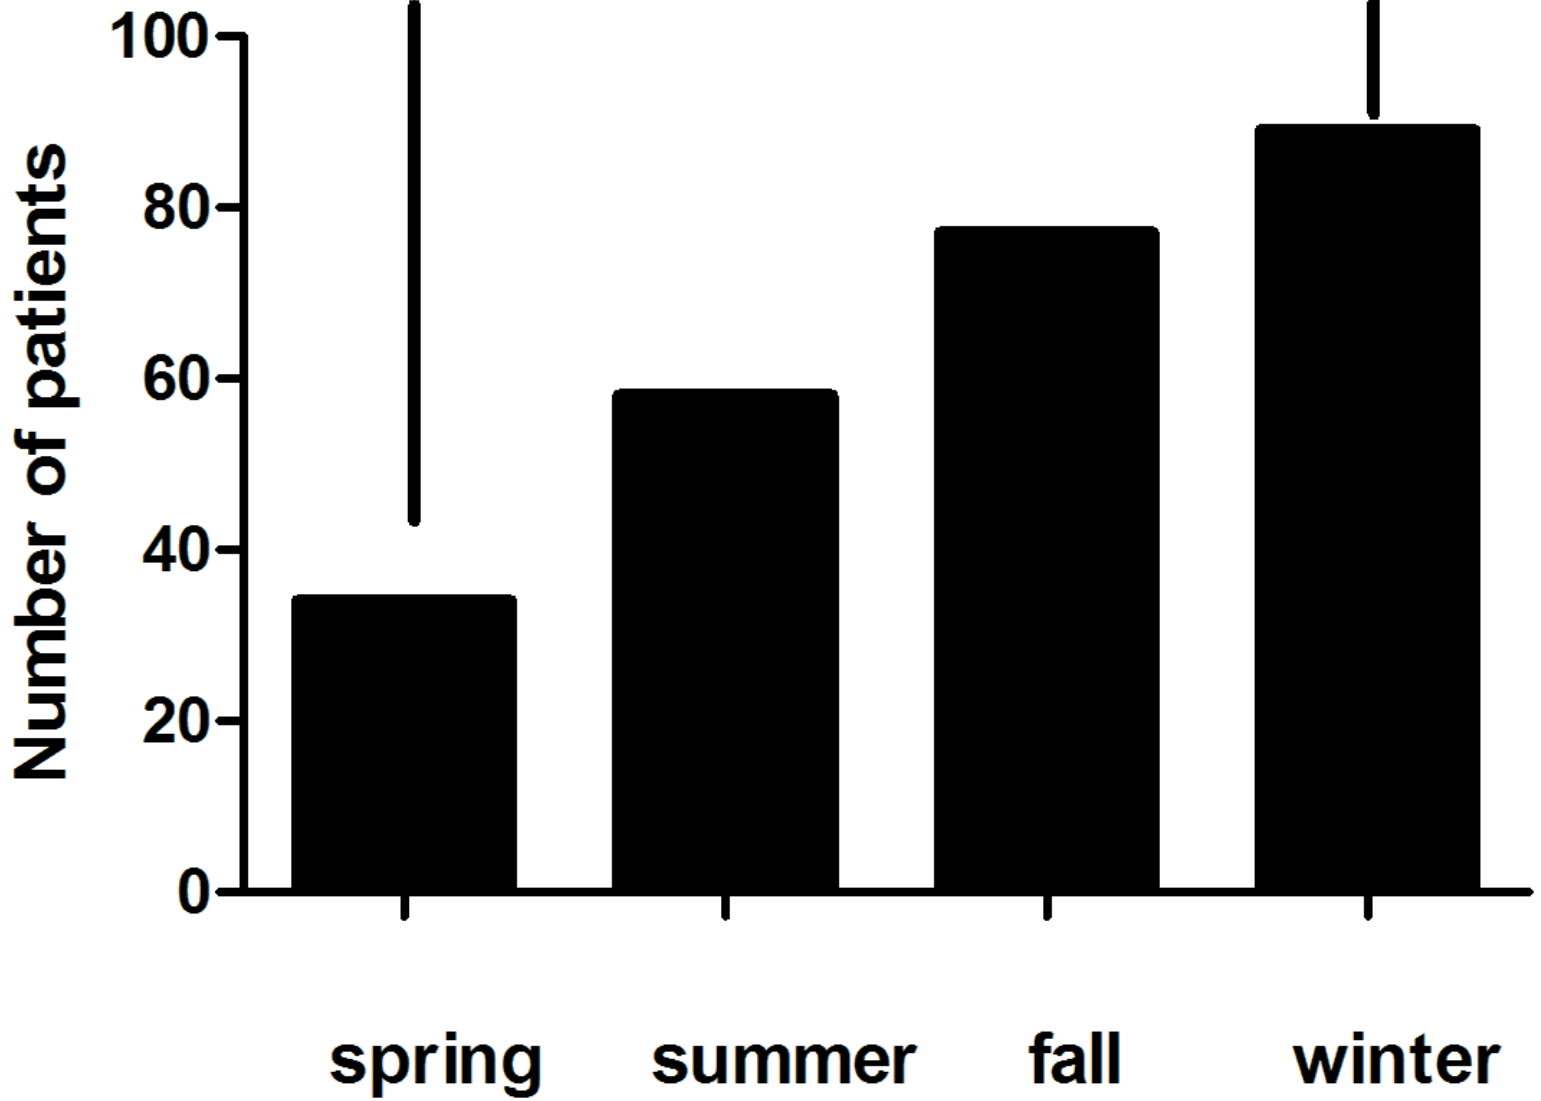

Source: https://www.biorxiv.org/content/10.1101/339317v1.full.pdf
